# Supplementary material for: Effects of structural changes of new organophosphorus cationic exchangers on a solvent extraction of cobalt, nickel and manganese from acidic chloride media
Source: Royal Society of Chemistry journal article supplement (doi:10.1039/c6ra21695a), 2016-12-21
Supplement: c6ra21695a1.pdf [file c6ra21695a1.pdf]

## SUPPORTING INFORMATION

### Effects of structural changes of new organophosphorus cationic exchangers on solvent extraction of cobalt, nickel and manganese from acidic chloride media

Kateryna Omelchuk<sup>a</sup>, Piotr Szczepański<sup>b</sup>, Akhilesh Shrotre<sup>a</sup>, Mansour Haddad<sup>a</sup> and Alexandre Chagnes<sup>a,c,\*</sup>

(a) PSL Research University, Chimie ParisTech - CNRS, Institut de Recherche de Chimie Paris, 11 rue Pierre et Marie Curie, 75005 Paris, France.

(b) Nicolaus Copernicus University in Toruń, Faculty of Chemistry, Gagarina 7, 87-100 Toruń, Poland

(c) GéoRessources - UMR CNRS 7359-CREGU-Université de Lorraine, 2 Rue du Doyen Roubault 54518 Vandoeuvre les Nancy Cedex (France). \*: Corresponding author : alexandre.chagnes@univ-lorraine.fr.

| No | Extractant                       | Structure                                                                           | pKa (in pur water) | T, °C | Ref. |
|----|----------------------------------|-------------------------------------------------------------------------------------|--------------------|-------|------|
| 1  | Bis(2-ethylhexyl)phosphoric acid | 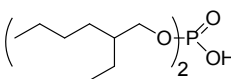 | 2.75               | NC    | 1    |
|    |                                  |                                                                                     | 2.79               | 25    | 2    |
| 2  | Dioctylphosphoric acid           |  | 1.48               | 20    | 3    |
|    |                                  |                                                                                     | 2.04<br>calculated | -     | 4    |
| 3  | Di-n-pentylphosphoric acid       |  | 0.93               | 25    | 3    |
|    |                                  |                                                                                     | 1.89               | NC    | 4    |
| 4  | Octylphosphonic acid octyl ester |  | 2.75               | 20-25 | 4    |
| 5  | Butylphosphonic acid decyl ester |  | 2.77               | 20-25 | 4    |

<sup>1</sup> Yao Binghua et al., "SOLVENT EXTRACTION OF METAL IONS AND SEPARATION OF NICKEL(II) FROM OTHER METAL IONS BY ORGANOPHOSPHORUS ACIDS," *Solvent Extraction and Ion Exchange* 14, no. 5 (August 1996): 849–70, doi:10.1080/07366299608918372.

<sup>2</sup> Xun Fu et al., "EXTRACTION OF SODIUM IN BIS (2, 4, 4 - TRIMETHYLPENTYL) PHOSPHINIC ACID 'CYANEX 272'™ BASIC CONSTANTS AND EXTRACTION EQUILIBRIA," *Solvent Extraction and Ion Exchange* 8, no. 4–5 (June 1990): 573–95, doi:10.1080/07366299008918018.

<sup>3</sup> "kolarik1982.pdf," n.d.

<sup>4</sup> "Modelisation Apostolyk.pdf," n.d.

|    |                                                           |                                                                                                  |               |       |   |
|----|-----------------------------------------------------------|--------------------------------------------------------------------------------------------------|---------------|-------|---|
| 6  | Dimethylphosphoric acid                                   | $(\text{CH}_3\text{O})_2\text{P}(=\text{O})\text{OH}$                                            | 1.25          | 20-25 | 4 |
| 7  | Diethylphosphoric acid                                    | $(\text{C}_2\text{H}_5\text{O})_2\text{P}(=\text{O})\text{OH}$                                   | 1.39          | 20-25 | 4 |
| 8  | Dipropylphosphoric acid                                   | $(\text{C}_3\text{H}_7\text{O})_2\text{P}(=\text{O})\text{OH}$                                   | 1.55          | 20-25 | 4 |
| 9  | Dibutylphosphoric acid                                    | $(\text{C}_4\text{H}_9\text{O})_2\text{P}(=\text{O})\text{OH}$                                   | 1.74          | 20-25 | 4 |
| 10 | Dihexylphosphoric acid                                    | $(\text{C}_6\text{H}_{13}\text{O})_2\text{P}(=\text{O})\text{OH}$                                | 1.96          | 20-25 | 4 |
| 11 | Pentylheptylphosphoric acid                               | $\text{C}_7\text{H}_{15}\text{O}-\text{P}(=\text{O})(\text{OH})-\text{C}_5\text{H}_{11}\text{O}$ | 1.95          | 20-25 | 4 |
| 12 | Butyloctylphosphoric acid                                 | $\text{C}_4\text{H}_9\text{O}-\text{P}(=\text{O})(\text{OH})-\text{C}_8\text{H}_{17}\text{O}$    | 1.89          | 20-25 | 4 |
| 13 | Nonylphosphonic acid hexyl ester                          | $\text{C}_6\text{H}_{13}\text{O}-\text{P}(=\text{O})(\text{OH})-\text{C}_9\text{H}_{19}$         | 2.76          | 20-25 | 4 |
| 14 | 2-Ethylhexylphosphonic acid mono-2-ethylhexyl ester PC88A |                                                                                                  | 3.30/<br>3.42 | 25    | 1 |
|    |                                                           |                                                                                                  | 3.30          | 25    | 2 |
| 15 | <i>t</i> -amylphosphonic acid                             |                                                                                                  | 2.88          | 25    | 5 |
| 16 | Neopentylphosphonic acid                                  |                                                                                                  | 2.84          | 25    | 5 |
| 17 | Methylphosphonic acid                                     | $\text{H}_3\text{C}-\text{P}(=\text{O})(\text{OH})_2$                                            | 2.38          | 25    | 5 |
| 18 | Ethylphosphonic acid                                      | $\text{C}_2\text{H}_5-\text{P}(=\text{O})(\text{OH})_2$                                          | 2.43          | 25    | 5 |
| 19 | <i>n</i> -propylphosphonic acid                           | $n\text{-C}_3\text{H}_7-\text{P}(=\text{O})(\text{OH})_2$                                        | 2.49          | 25    | 5 |

<sup>5</sup> Peter C. Crofts and Gennady M. Kosolapoff, "Preparation and Determination of Apparent Dissociation Constants of Some Alkylphosphonic and Dialkylphosphinic Acids<sup>1</sup>," *Journal of the American Chemical Society* 75, no. 14 (1953): 3379–3383.

|    |                                                      |                                                                                     |               |           |     |
|----|------------------------------------------------------|-------------------------------------------------------------------------------------|---------------|-----------|-----|
| 20 | Isopropylphosphonic acid                             | 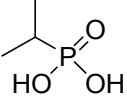   | 2.66          | 25        | 5   |
| 21 | <i>n</i> -butylphosphonic acid                       |    | 2.59          | 25        | 5   |
| 22 | <i>iso</i> -butylphosphonic acid                     |    | 2.70          | 25        | 5   |
| 23 | <i>s</i> -butylphosphonic acid                       |    | 2.74          | 25        | 5   |
| 24 | <i>tert</i> -butylphosphonic acid                    |    | 2.79          | 25        | 5   |
| 25 | Dimethylphosphinic acid                              |    | 3.08          | 25        | 5   |
| 26 | Diethylphosphinic acid                               |   | 3.29/<br>3.10 | 25        | 5   |
| 27 | Dipropylphosphinic acid                              |  | 3.46/<br>3.26 | 25        | 5   |
| 28 | Dibutylphosphinic acid                               |  | 3.41/<br>3.30 | 25        | 5   |
|    |                                                      |                                                                                     | 3.39/3.<br>30 | 20        | 3,5 |
| 29 | Di- <i>tert</i> -butylphosphinic acid                |  | 4.24          | 25        | 4,5 |
| 30 | Dipentylphosphinic acid                              |  | 3.52          | 20-<br>25 | 3,4 |
| 31 | Di- <i>n</i> -hexylphosphinic acid                   |  | 3.55          | 20-<br>25 | 3,4 |
| 32 | Di- <i>n</i> -octylphosphinic acid                   |  | 3.62          | NC        | 4,3 |
| 33 | Bis(2,4,4-trimethylpentyl)phosphinic acid Cyanex 272 |  | 3.73          | 25        | 1   |

|    |                                            |                                                                                     |               |    |                               |
|----|--------------------------------------------|-------------------------------------------------------------------------------------|---------------|----|-------------------------------|
| 34 | Bis(2-ethylhexyl)phosphinic acid,<br>PIA-8 | 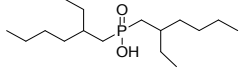   | 4.48          | 25 | 1                             |
| 35 | Di- <i>iso</i> -propylphosphinic acid      |    | 3.56          | 25 | 5                             |
| 36 | Di- <i>tert</i> -butylphosphinic acid      |    | 4.24          | 25 | 5                             |
| 37 | Dibenzylphosphoric acid                    |    | 0.60          | 25 | 3                             |
| 38 | Di p-cresylphosphoric acid                 |    | 0.34          | 20 | 3                             |
| 39 | Di p-chlorophenylphosphoric acid           |    | 0.20          | 20 | 3                             |
| 40 | Di β-naphtylphosphoric acid                |   | 0.74          | 20 | 3                             |
| 41 | Diphenylphosphoric acid                    |  | 0.26          | 20 | 3                             |
|    |                                            |                                                                                     | 0.82<br>water | NC | 3                             |
| 42 | 4-Aminobutylphosphonic acid                |  | 2.55          | 25 | Lange's Handbook of Chemistry |
| 43 | 2-Aminoethylphosphonic acid                |  | 2.45<br>(+1)  | 25 | Lange's Handbook of Chemistry |
| 44 | Bromomethylphosphonic acid                 |  | 1.14          | 25 | Lange's Handbook of Chemistry |
| 45 | 4-Bromophenylphosphinic acid               |  | 2.1           | 25 | Lange's Handbook of Chemistry |
| 46 | 2-Bromophenylphosphonic acid               |  | 1.64          | 25 | Lange's Handbook of Chemistry |

|    |                                      |                                                                                     |         |    |                                                                      |
|----|--------------------------------------|-------------------------------------------------------------------------------------|---------|----|----------------------------------------------------------------------|
| 47 | 3-Bromophenylphosphonic acid         | 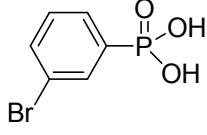   | 1.45    | 25 | Lange's Handbook of Chemistry                                        |
| 48 | 2-chlorophenylphosphonic acid        |    | 1.63    | 25 | Lange's Handbook of Chemistry                                        |
| 49 | 3-chlorophenylphosphonic acid        |    | 1.55    | 25 | Lange's Handbook of Chemistry                                        |
| 50 | 4-chlorophenylphosphonic acid        |    | 1.66    | 25 | Lange's Handbook of Chemistry                                        |
| 51 | (2-methoxyphenyl)phosphonic acid     |    | 2.16    | 25 | Lange's Handbook of Chemistry,<br>McGraw-Hill Handbook, 15eme<br>ed. |
| 52 | (4-methoxyphenyl)phosphonic acid     |   | 2.4     | 17 | Lange's Handbook of Chemistry                                        |
| 53 | (3-methylamino)phenylphosphonic acid |  | 1.1(+1) | 25 | Lange's Handbook of Chemistry                                        |
| 54 | (4-methoxyphenyl)phosphinic acid     |  | 2.35    | 17 | Lange's Handbook of Chemistry                                        |
| 55 | Hydroxymethylphosphoric acid         |  | 1.91    | 25 | Lange's Handbook of Chemistry                                        |
